# Supplementary material for: POWR1 is a domestication gene pleiotropically regulating seed quality and yield in soybean
Source: PubMed Central journal article supplement (PMC9160092; doi:10.1038/s41467-022-30314-7), 2022-06-01
Supplement: 41467_2022_30314_MOESM1_ESM.pdf [file 41467_2022_30314_MOESM1_ESM.pdf]

***POWR1* is a domestication gene pleiotropically regulating seed  
quality and yield in soybean**

Goettel *et al.*

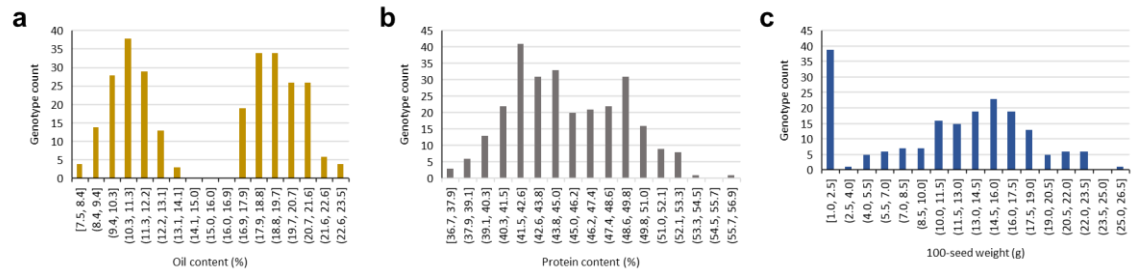

**Supplementary Figure 1.** Phenotypic distribution of the seed traits used for the association studies. **a**, **b**, and **c**, illustrate the phenotypic distribution of seed oil content, protein content, and 100-seed weight, respectively.

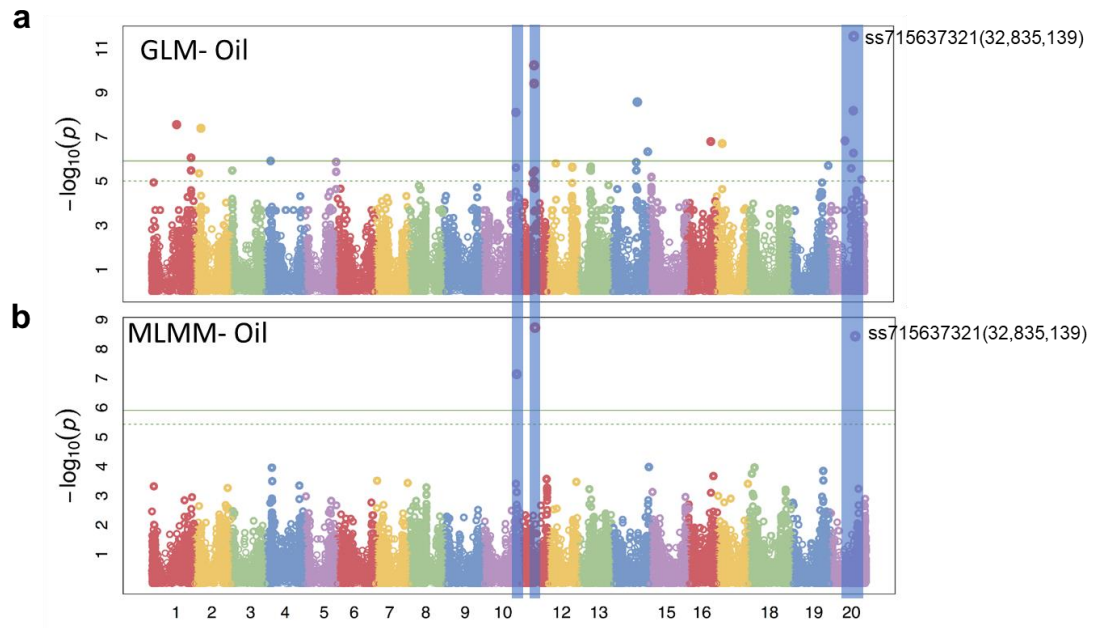

**Supplementary Figure 2.** GWAS of oil content in the 278 diverse accessions. **a**, GWAS of oil content with GLM model. **b**, GWAS of oil content with MLM model.

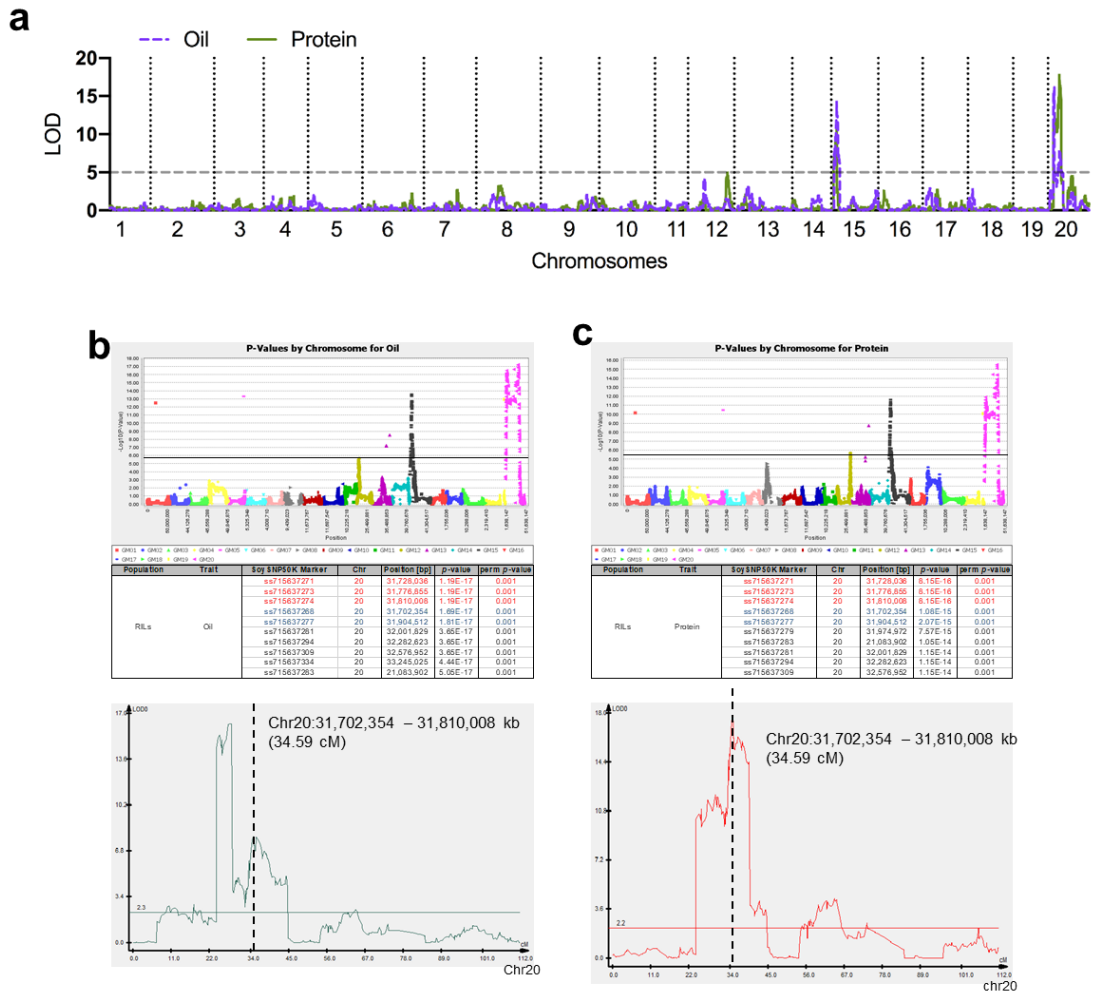

**Supplementary Figure 3.** GWAS and linkage mapping of oil content and protein content using 300 RILs. **a** Linkage mapping result of oil and protein content. **b-c**, Association and linkage mapping results of protein and oil content. The most significant associations for both traits are provided below the corresponding Manhattan plot.

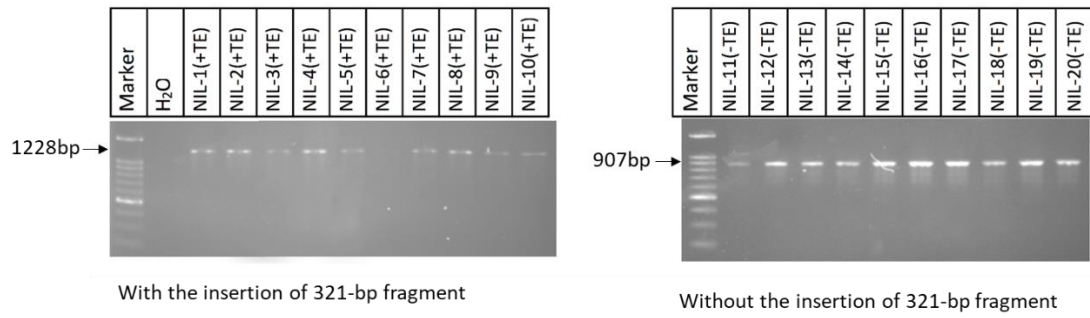

**Supplementary Figure 4.** PCR-based genotyping of the 321-bp TE in NILs for *POWRI*. NILs show a 1228-bp PCR amplicon with the 321-bp TE insertion while NILs show a 907-bp fragment without the 321-bp TE insertion. This assay was repeated twice.

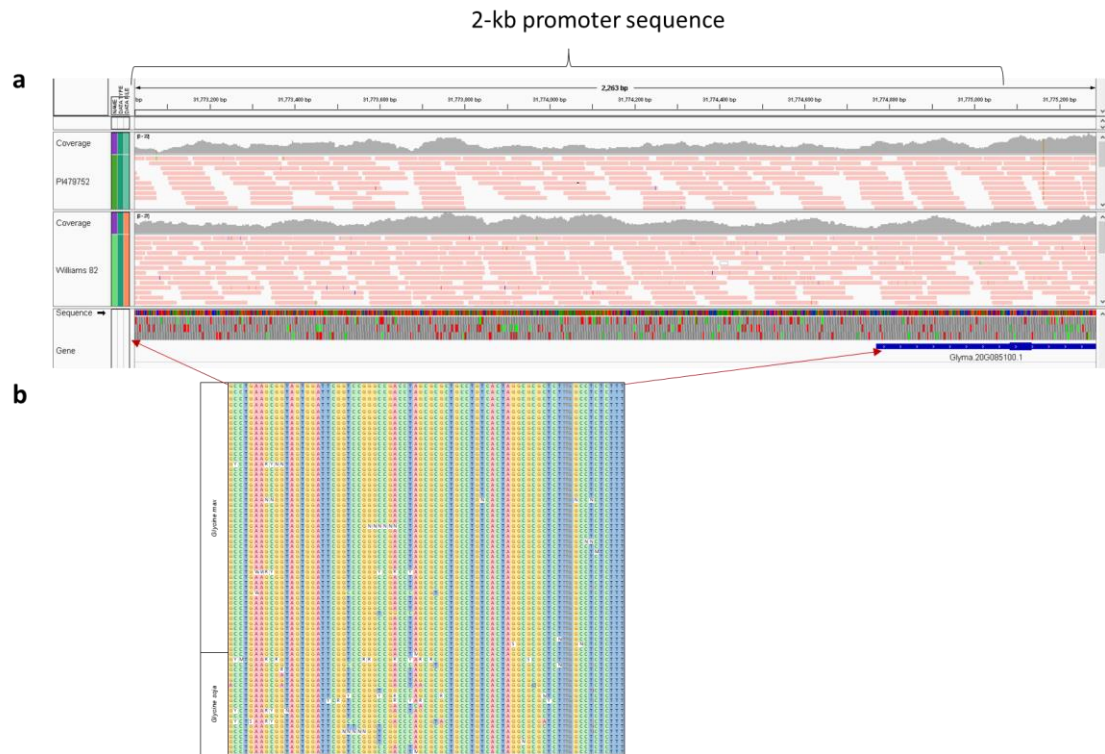

**Supplementary Figure 5.** Comparison of promoter sequences between two *POWR1* alleles. **a**, IGV visualization of read alignment in the 2-kb region upstream of the start codon of *POWR1* in the parental lines of the RIL population, PI479752 and Williams 82. **b**, Sequence comparison reveals nearly identical promoter sequences between two groups carrying *POWR1*<sub>-TE</sub> (20 *G. soja* accessions) and *POWR1*<sub>+TE</sub> (51 *G. max* accessions). No correlation of seed traits with any DNA variants in their promoters.

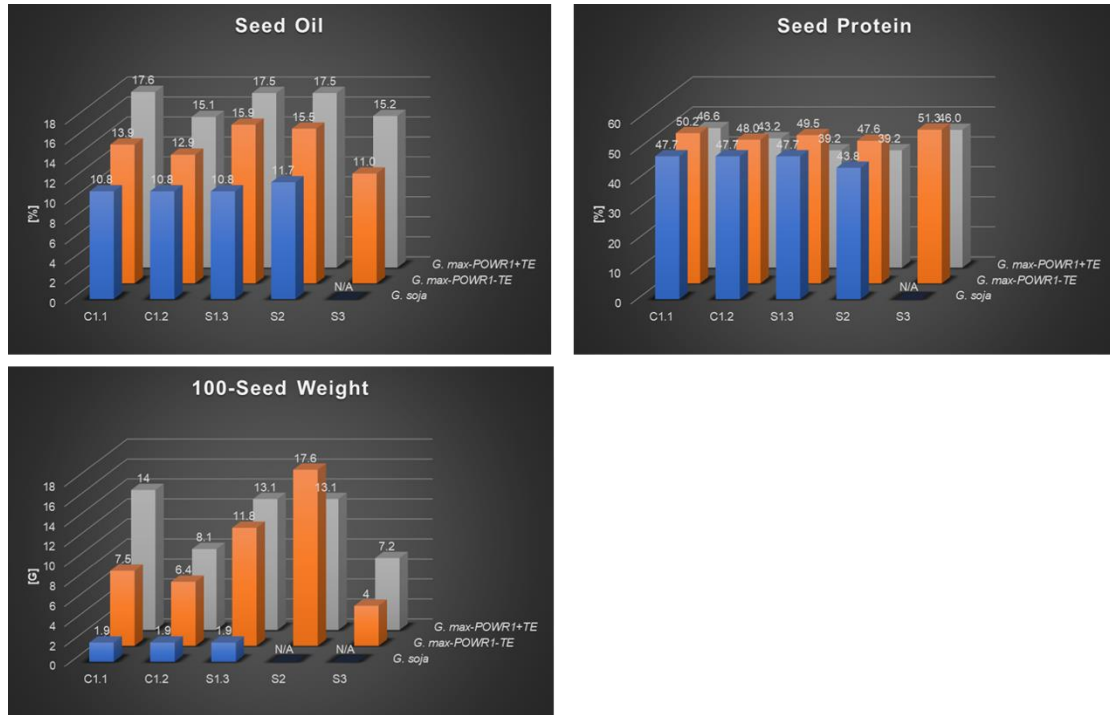

**Supplementary Figure 6.** Phenotypic changes associated with the transfer of a *POWR1-TE* from *G. soja* into *G. max*. Seed oil content, seed protein content and 100-seed weight of *G. max-POWR1-TE* accessions are compared to their closest *G. soja* accessions and *G. max-POWR1+TE* accessions based on local and global phylogenetic analyses (see Fig. 4). The average phenotype values for the Korean clusters 1.1 (C1.1) and 1.2 (C1.2) are given. Both S1.3 and S2 only contain one Japanese accession. A representative accession for S3 is shown. NA: data not available.

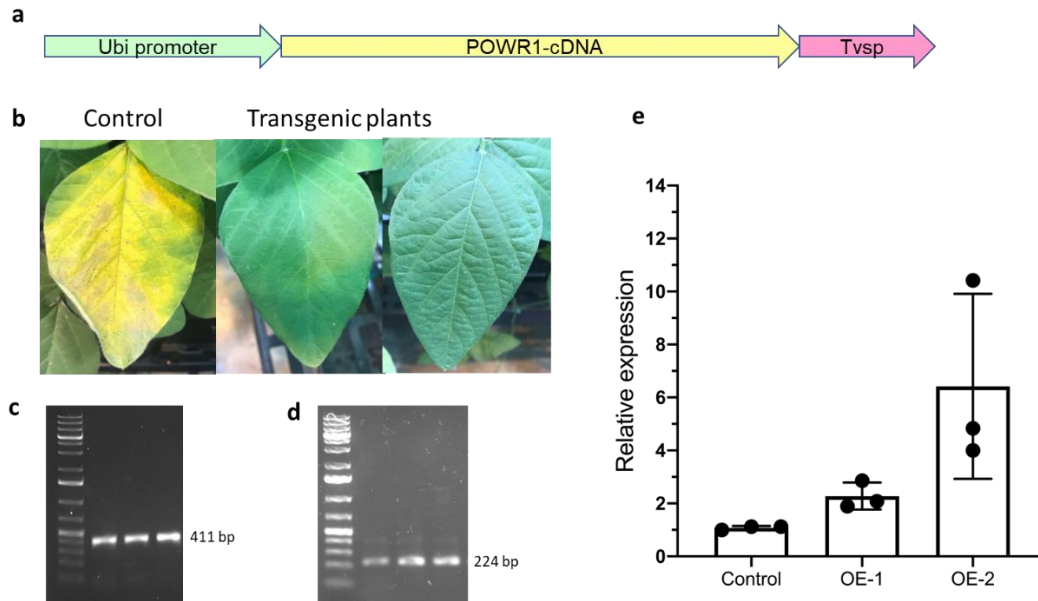

**Supplementary Figure 7.** Identification of positive transgenic plants by Basta leaf painting assay. **a**, Schematic illustration of the construct (*Ubi917::POWR1*) that was used for overexpression of *POWR1*<sub>TE</sub> in soybean. **b**, Basta leaf painting assay showed basta resistance in two transgenic lines and yellowish wilting leaves in control plants. **c** and **d**, PCR verification of three positive transgenic plants using *bar*-specific and *POWR1*-cDNA-specific primers. This assay was repeated twice. **e**, Relative seed expression of *POWR1* in control and two transgenic plants (n=3). Error bars represent SD (standard derivation). Source data are provided as a Source Data file.



**a**

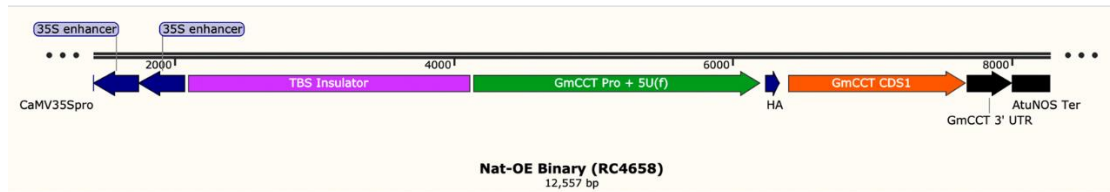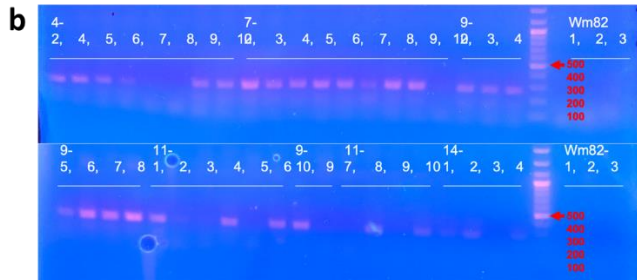

**Supplementary Figure 8.** Vector diagram and transgenic plant confirmation. **a**, Diagram for the vector used for transformation. **b**, PCR examination for selected lines containing native promoter-driven *POWR1*-TE. PCR produced 266bp in transgenic plants, but not in non-transformed soybean. Wm82 plants is used as a negative control. This assay was repeated twice.

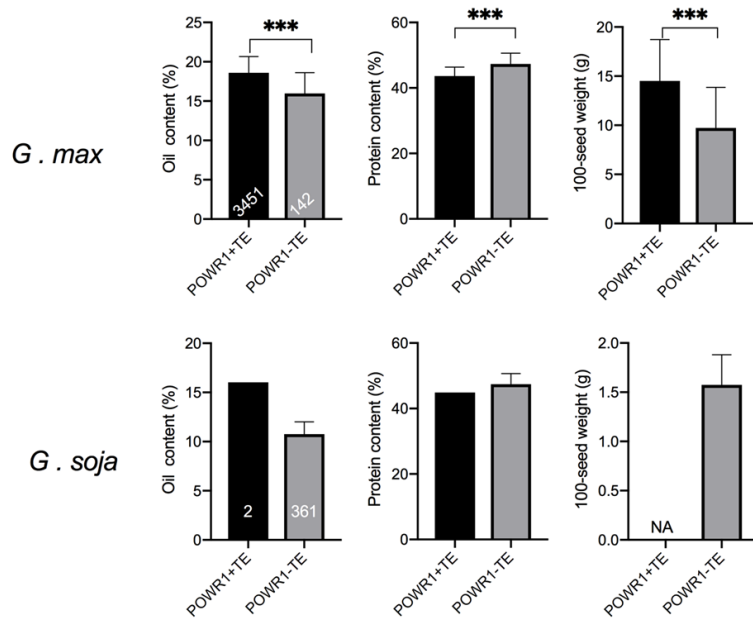

| Genotype                   | Number | Percentage |
|----------------------------|--------|------------|
| G. max- <i>POWR1</i> +TE   | 3,451  | 96.05%     |
| G. max- <i>POWR1</i> -TE   | 142    | 3.95%      |
| Subtotal                   | 3,593  | 100.00%    |
| G. soja- <i>POWR1</i> +TE  | 2      | 0.55%      |
| G. soja - <i>POWR1</i> -TE | 361    | 99.45%     |
| Subtotal                   | 363    | 100.00%    |
| Total                      | 3,956  |            |

**Supplementary Figure 9.** Frequency of *POWR1* alleles in a diverse population consisting of 3,956 accessions and the allele effects on protein, oil and seed weight from analyzing their whole genome resequencing data.

**Supplementary Table 1.** Genotyping analysis of the 321-bp InDel in 30 RILs and their parental lines.

| Common Name                         | TE insertion | Oil content [%] | Protein content [%] |
|-------------------------------------|--------------|-----------------|---------------------|
| PI479752                            | no           | 9.6             | 44.4                |
| I1376                               | no           | 11.3            | 46.0                |
| I628                                | no           | 11.5            | 44.2                |
| I976                                | no           | 11.5            | 48.0                |
| I695                                | no           | 11.9            | 46.5                |
| I1338                               | no           | 12.0            | 46.9                |
| I828                                | no           | 12.1            | 46.8                |
| I668                                | no           | 12.2            | 44.8                |
| I1375                               | no           | 12.3            | 46.7                |
| I680                                | no           | 12.3            | 44.2                |
| I1530                               | no           | 12.5            | 45.6                |
| I144                                | no           | 13.2            | 46.4                |
| I1593                               | no           | 13.6            | 46.2                |
| I665                                | no           | 13.6            | 46.1                |
| I1630                               | no           | 13.7            | 46.4                |
| I200                                | no           | 15.3            | 38.8                |
| I306                                | yes          | 15.9            | 39.0                |
| I646                                | yes          | 16.1            | 38.4                |
| I1652                               | yes          | 16.3            | 38.8                |
| I1342                               | yes          | 16.7            | 38.9                |
| I1490                               | yes          | 17.1            | 38.7                |
| I684                                | yes          | 17.5            | 41.2                |
| I477                                | yes          | 17.6            | 39.9                |
| I32                                 | yes          | 17.6            | 40.6                |
| I1234                               | yes          | 17.6            | 39.0                |
| I347                                | yes          | 17.7            | 41.3                |
| I333                                | yes          | 17.8            | 38.6                |
| I1596                               | yes          | 18.2            | 37.9                |
| I259                                | yes          | 18.3            | 39.4                |
| I113                                | yes          | 18.3            | 39.7                |
| I581                                | yes          | 18.6            | 37.6                |
| Williams82                          | yes          | 20.5            | 39.3                |
| Average                             | no           | 12.4            | 45.5                |
| Average                             | yes          | 17.6            | 39.3                |
| Difference between average contents | -            | 5.2             | 6.2                 |
| <i>p</i> -value (T-test)            | -            | 4.00E-13        | 3.53E-10            |

**Supplementary Table 2.** Primers used in this study.

| <b>Primer name</b> | <b>Forward (5'-&gt;3')</b> | <b>Reverse (5'-&gt;3')</b> |
|--------------------|----------------------------|----------------------------|
| Bar gene           | AAGCACGGTCAACTTCCGTA       | AAGTCCAGCTGCCAGAAACC       |
| POWR1-PCR          | TGGCACCAGAAATCTCACACT      | TCCTTGTTTATGGCTCTCTCCA     |
| NIL-PCR            | CACTTCAAGGGTGGCAGTGTT      | CGGGATGGGAAAAGTGCCTA       |
| AAP1_qRT           | TGGTTGCCCTTGGGAATGTGTG     | TGGTTGGGCAAGCACCTGATATG    |
| SUC2_qRT           | AAAGGCTGCAGAACATGAACGC     | GCAGCAGCTTTGACACCAAGTG     |
| SUS4_qRT           | AATCTCCCAGGGTGGACTCAAG     | GGCGTTC AAGATTGGTCACATGC   |
| GmWRI1a_qRT        | ACTTGGTGGGCATGTTTGATAGTG   | AGTCTCATCACCAGGTTGAGTGC    |
| GmABI3b_qRT        | TGTA CTGGCAGGCTATGATTGGC   | TGACAATTCTGTGTCTGCATGGC    |
| ABI5_qRT           | GGCTCATTATCTGTCCCTCCT      | CCCAAGTGT TTTGTTGCCTTT     |
| GmOLEO1_qRT        | AGGCGCGTGAGATCAAGGACTATG   | GCGTGCACACGATTAAGAAGCC     |
| GmDGAT1A_qRT       | ACTGAAGGTGCACGTGGATAAGC    | GGAAATCCTTCAGAGCAGCCACTG   |
| BCAT-2_qRT         | GACTGGTGCCCAAAGAATGTGC     | GGAACCCAACGCTTATTAGCCAAG   |
| AAE5_qRT           | AGGAGGGTGTGTGATGTTAGGC     | CCAACCGTTCTTGAAACA ACTTGC  |
| GPAT9_qRT          | GATCATGTCTCTGGGAGCTAACAAC  | TTGTGCAGCCAAGTTCAAACGC     |

**Supplementary Table 3.** Information of accessions used for RNA-Seq and *POWRI* expression levels.

| <b>PI</b> | <b>Common name</b> | <b>Species subspecies</b> | <b>TE insertion</b> | <b>FPKM</b> | <b>Average FPKM</b> | <b>StDev</b> |
|-----------|--------------------|---------------------------|---------------------|-------------|---------------------|--------------|
| PI518671  | Williams 82        | <i>Glycine max</i>        | yes                 | 1.010692    | 0.6679555           | 0.18984621   |
| PI540556  | Jack               | <i>Glycine max</i>        | yes                 | 0.724321    |                     |              |
| PI548348  | Illini             | <i>Glycine max</i>        | yes                 | 0.506646    |                     |              |
| PI548631  | Williams           | <i>Glycine max</i>        | yes                 | 0.673904    |                     |              |
| PI548656  | Lee                | <i>Glycine max</i>        | yes                 | 0.589683    |                     |              |
| PI598124  | Maverick           | <i>Glycine max</i>        | yes                 | 0.502487    |                     |              |
| PI647962  | R95-1705           | <i>Glycine max</i>        | no                  | 0.847271    | 0.9701485           | 0.28815252   |
| -         | JL275              | <i>Glycine max</i>        | no                  | 0.632052    |                     |              |
| -         | LLL05-14           | <i>Glycine max</i>        | no                  | 1.282608    |                     |              |
| -         | S09-2902-145       | <i>Glycine max</i>        | no                  | 1.118663    |                     |              |
