# Supplementary material for: POWR1 is a domestication gene pleiotropically regulating seed quality and yield in soybean
Source: PubMed Central journal article supplement (PMC9160092; doi:10.1038/s41467-022-30314-7), 2022-06-01
Supplement: 41467_2022_30314_MOESM3_ESM.pdf [file 41467_2022_30314_MOESM3_ESM.pdf]

### **Description of Additional Supplementary Files**

File Name: Supplementary Data 1

Description: Information for all soybean accessions used in this study.

File Name: Supplementary Data 2

Description: SNPs significantly associated with seed protein and oil content and 100-seed weight.

File Name: Supplementary Data 3

Description: TE genotypes of accessions used for biparental QTL mapping experiments.

File Name: Supplementary Data 4

Description: Differentially expressed genes identified by RNA-Seq.
